# Supplementary material for: Multiple SARS-CoV-2 variants escape neutralization by vaccine-induced humoral immunity
Source: PubMed Central journal article supplement — medRxiv. 2021 Mar 12:2021.02.14.21251704. Originally published 2021 Feb 18. Preprint. [Version 2] doi: 10.1101/2021.02.14.21251704 (PMC7899476; doi:10.1101/2021.02.14.21251704), 2021-03-12
Supplement: NIHPP2021.02.14.21251704-supplement-1.pdf [file NIHPP2021.02.14.21251704-supplement-1.pdf]

## Figure S1

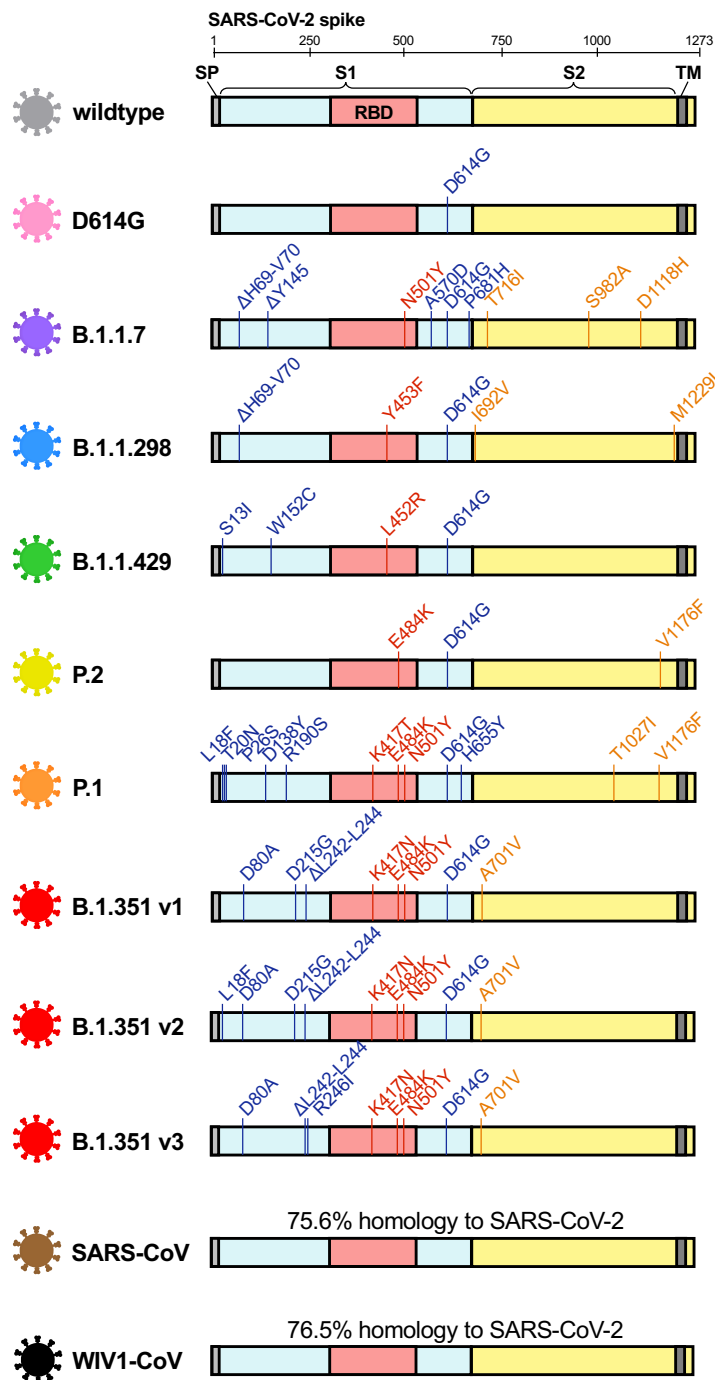

**Figure S1: SARS-CoV-2 variants tested in this study.**

Schematic of mutations in the spike protein sequence of the following SARS-CoV-2 variants are illustrated: wild type (grey), D614G (pink), B.1.1.7 (purple), B.1.1.298 (blue), B.1.1.429 (green), P.2 (yellow), P.1 (orange), three variants of B.1.351 (red; v1, v2, and v3), SARS-CoV (brown), and WIV1-CoV (black).

Figure S2

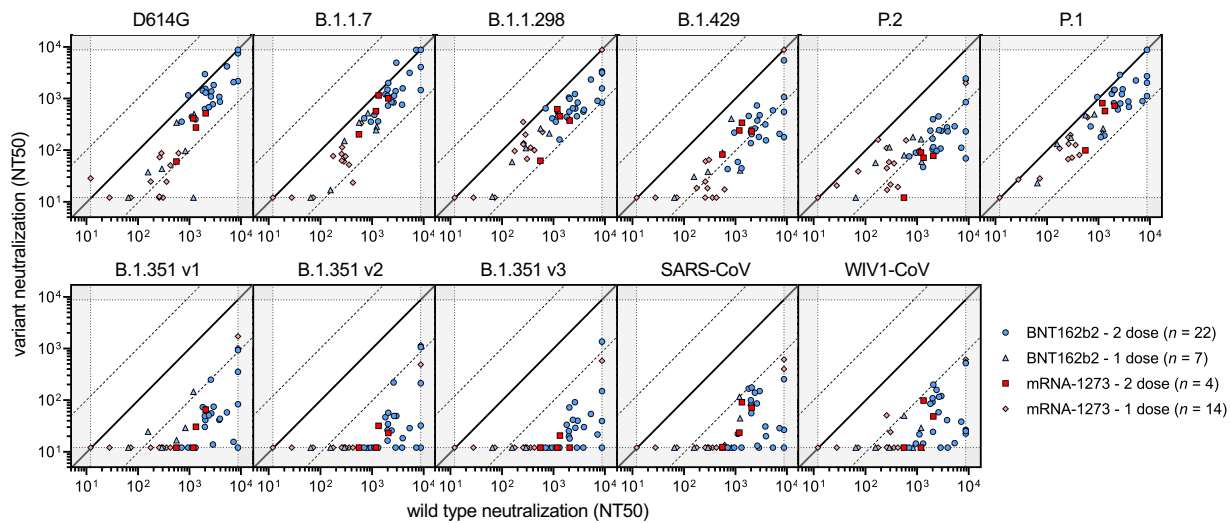

**Figure S2: Correlations of SARS-CoV-2 variant neutralization titers.**

Correlations between neutralization of wild-type and the indicated variant pseudoviruses are demonstrated. The solid diagonal black line indicates identical neutralization, and the dotted diagonal black lines indicate a 10-fold difference in neutralization (NT50). Four groups of vaccine recipients are indicated: (i) vaccine recipients >7 days out from their second dose of BNT-162b2 vaccine ( $n = 22$ , blue circles); (ii) vaccine recipients that received only one dose of the BNT-162b2 vaccine or were <7 days from their second dose ( $n = 7$ , light blue triangles); (iii) vaccine recipients >7 days out from their second dose of the mRNA-1273 vaccine ( $n = 4$ , red squares); and (iv) vaccine recipients that received only one dose of the mRNA-1273 vaccine or were <7 days from their second dose ( $n = 14$ , pink diamonds).

**Figure S3**

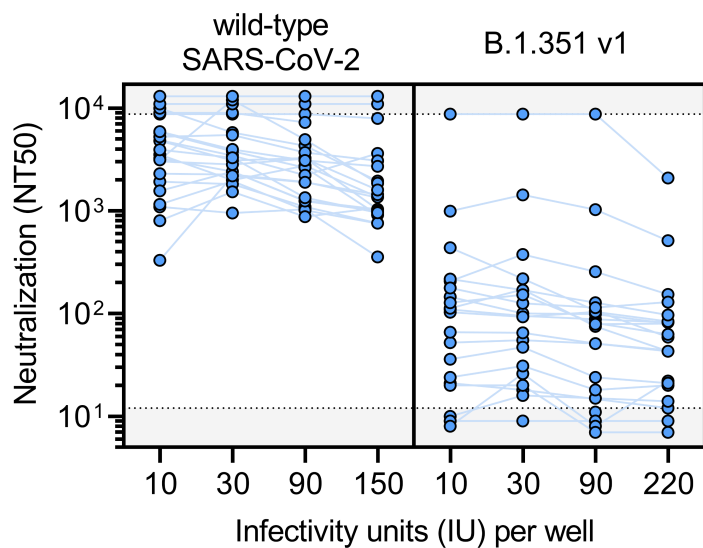

**Figure S3: Determination of neutralization titers over a wide range of pseudovirus quantities**

To determine the consistency of neutralization titers (NT50) measured by this assay, varying amounts of infectious units per well of wild-type SARS-CoV-2 and B.1.351 v1 pseudovirus were used to perform the neutralization assay for 22 serum samples from BNT162b2 vaccine recipients >7 days out from their second dose. These data demonstrate the robustness of calculating NT50 across a 22-fold range of infectious units of pseudovirus.
